# Supplementary material
Source: publisher site journal article supplement (https://www.dovepress.com/article/536776)

Supplementary Information

Supplementary Table 1. 21 triaptosis-related genes (TRGs).

| PIK3C3 (encodes class III PI 3-kinase VPS34) |
| --- |
| PIK3R4 (encodes VPS15) |
| MTM1 (antagonist of VPS34 phosphatase) |
| KEAP1 |
| NFE2L2 (inhibited by KEAP1) |
| SH3GL3 (mediates rapid endocytosis) |
| ELMO2 |
| NCKAP1 |
| ACTN2 |
| KXD1 (related to endocytosis) |
| WDR91 |
| FYCO1 |
| RAB9A |
| SCARB2 |
| ANXA8 |
| CLCN4 |
| ATP13A2 (associated with late endosomes) |
| RAB7 |
| UVRAG |
| BECN1 (related to endosomal VPS34 complex II) |
| RAB5A (recruits and activates VPS34 complex II) |

Supplemental Figure 1. Evaluation of batch correction and triaptosis-related gene expression patterns across fibroblast subpopulations.

(A) UMAP plot displaying all integrated cells color-coded by dataset source (self-sequencing vs. GSE163973), demonstrating effective batch correction and mixing of major cell types following Harmony integration.

(B) Bar graph summarizing the number of cells in each identified cell type across the two datasets, validating the consistency of cell type annotation and sample integration.

(C) UMAP plots showing the expression patterns of selected triaptosis-related genes (TRGs) across fibroblast subpopulations, revealing transcriptional heterogeneity and suggesting diverse triaptosis signaling states within the fibroblast compartment.


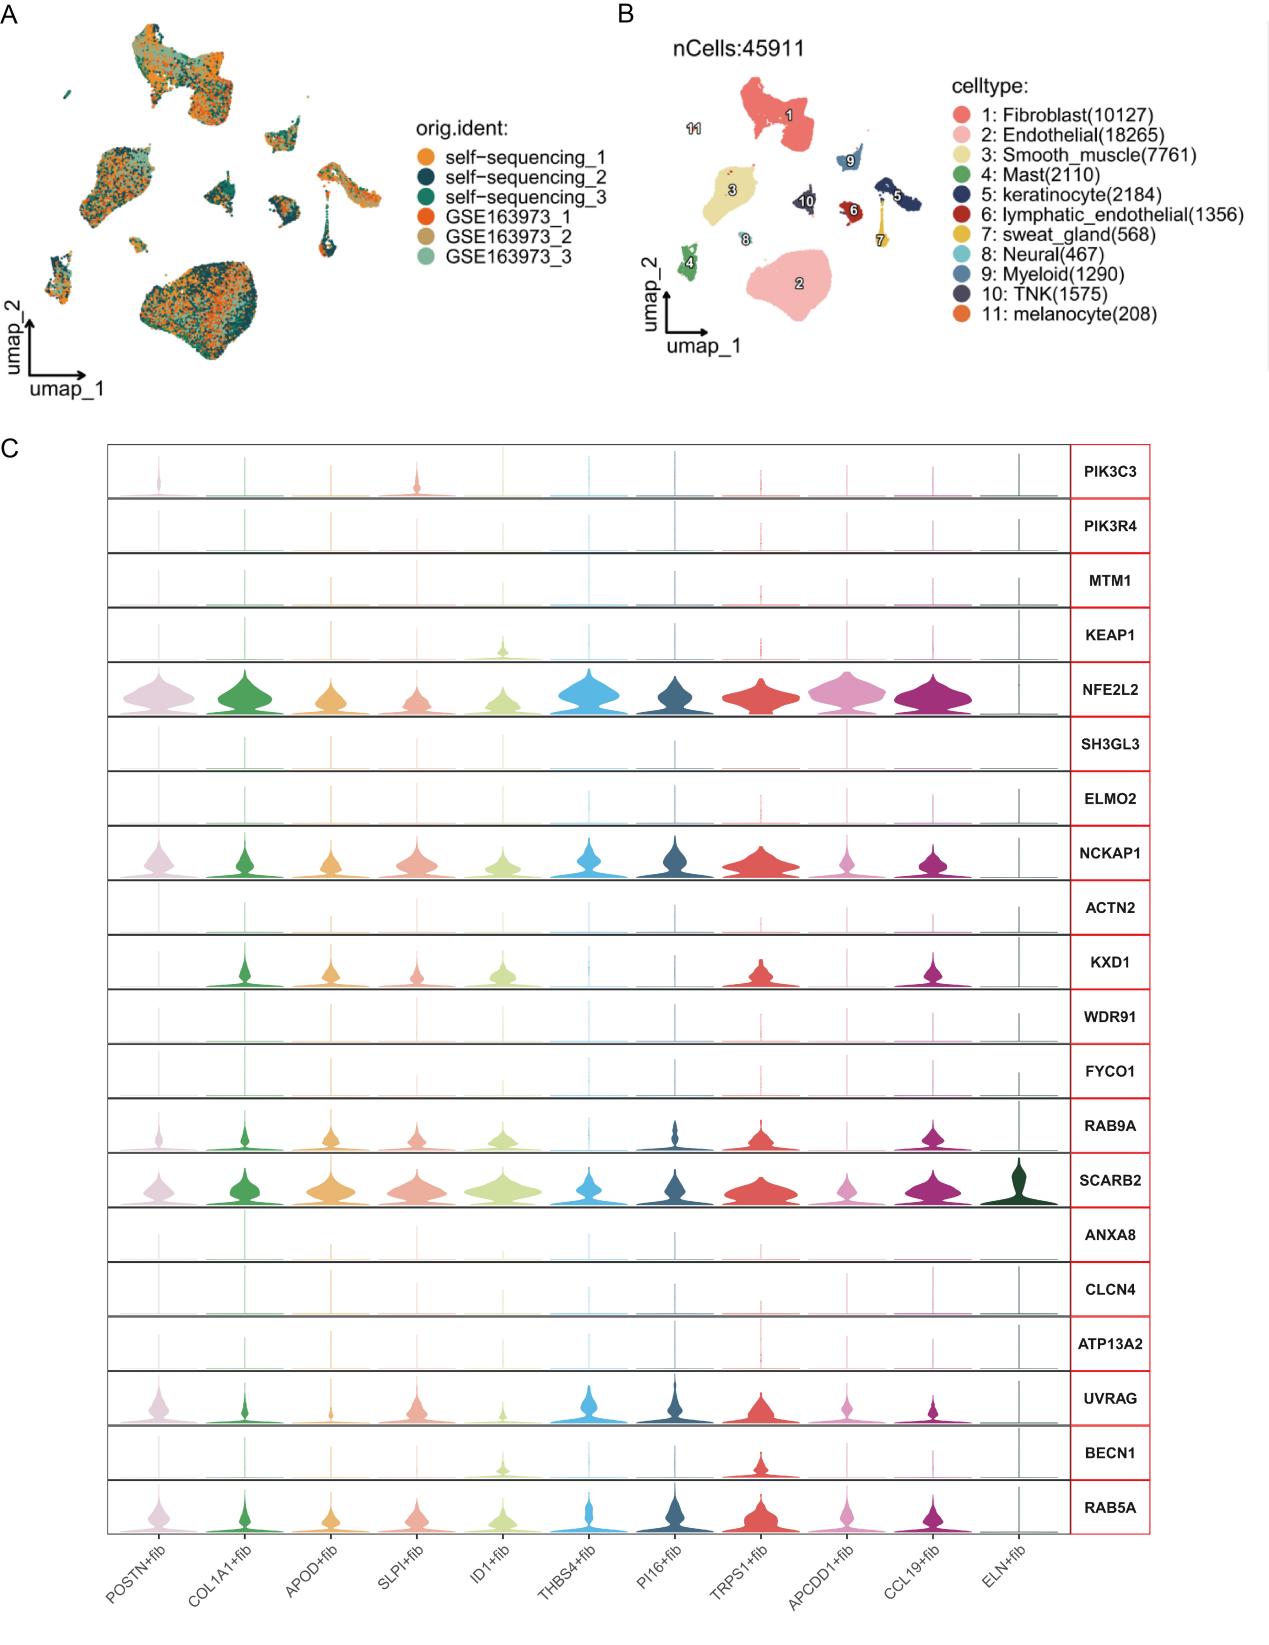

Supplement: Supplementary file 1 [file Supplementary%20Materials.docx]
